# Supplementary material for: Mutual amplification of HNF4α and IL-1R1 composes an inflammatory circuit in Helicobacter pylori associated gastric carcinogenesis
Source: PubMed Central journal article supplement (PMC4905478; doi:10.18632/oncotarget.7239), 2016-02-08
Supplement: oncotarget-07-11349-s001.pdf [file oncotarget-07-11349-s001.pdf]

## SUPPLEMENTARY TABLES AND FIGURES

Supplementary Table S1: PCR primers used in this study

|                                         |                                                                                        |
|-----------------------------------------|----------------------------------------------------------------------------------------|
| <b>HNF4<math>\alpha</math></b>          | Forward:5'-TGTCCCGACAGATCACCTC-3'<br>Reverse:5'-CACTCAACGAGAACCAGCAG-3'                |
| <b>P1 HNF4<math>\alpha</math></b>       | Forward:5'-GAATGCGACTCTCCAAAACC-3'<br>Reverse:5'-GGCACTGGTTCCTCTTGTCT-3'               |
| <b>P2 HNF4<math>\alpha</math></b>       | Forward:5'-GGGCTCCAGTGGAGAGTTC-3'<br>Reverse:5'-CATAGCTTGACCTTCGAGTGC-3'               |
| <b>IL-1R1</b>                           | Forward:5'-GATTCCTGCTATGATTTTCTC-3'<br>Reverse:5'-AGTCTTCTGCTTTTCTTTACG-3'             |
| <b>pGL3-P1HNF4<math>\alpha</math></b>   | Forward:5'-GGTACCAATCATTTACCCAAGGTCCCA-3'<br>Reverse:5'-AAGCTTCACCCCAAGTCAGGCATTCTA-3' |
| <b>pGL3-P2 HNF4<math>\alpha</math></b>  | Forward:5'-GGTACCCCTGGTTCAAACGATTCTC-3'<br>Reverse:5'-AAGCTTCTCATAGTTTGCCCTGCTTC-3'    |
| <b>pGL3-IL-1R1</b>                      | Forward:5'-GGTACCGCAAGGAGCCCAAGGTGT-3'<br>Reverse:5'-AAGCTTCAGATCCCGAAGCAAACG-3'       |
| <b>P1 HNF4<math>\alpha</math>(ChIP)</b> | Forward:5'-GGGAACCGGGAAACTGCG-3'<br>Reverse:5'-CCCACGATTTAGAAACCTA-3'                  |
| <b>P2 HNF4<math>\alpha</math>(ChIP)</b> | Forward:5'-CCTCCCGTTTGCCACCA-3'<br>Reverse:5'-CCTGTAACCCAGCATT-3'                      |
| <b>Actin</b>                            | Forward:5'-AGTTGCGTTACACCCTTTCTTG-3'<br>Reverse:5'-CACCTTCACCGTTCCAGTTTT-3'            |

Supplementary Table S2: Incidence of AG and expression of HNF4 $\alpha$  in mice given MNU and infected with Hp

| Group   | Number of animals |     | Incidence of AG | High expression of HNF4 $\alpha$ (No.) |
|---------|-------------------|-----|-----------------|----------------------------------------|
|         | Initial           | End |                 |                                        |
| Control | 12                | 12  | 0               | 0                                      |
| MNU     | 12                | 10  | 4               | 2                                      |
| MNU+Hp  | 12                | 9   | 6               | 6                                      |

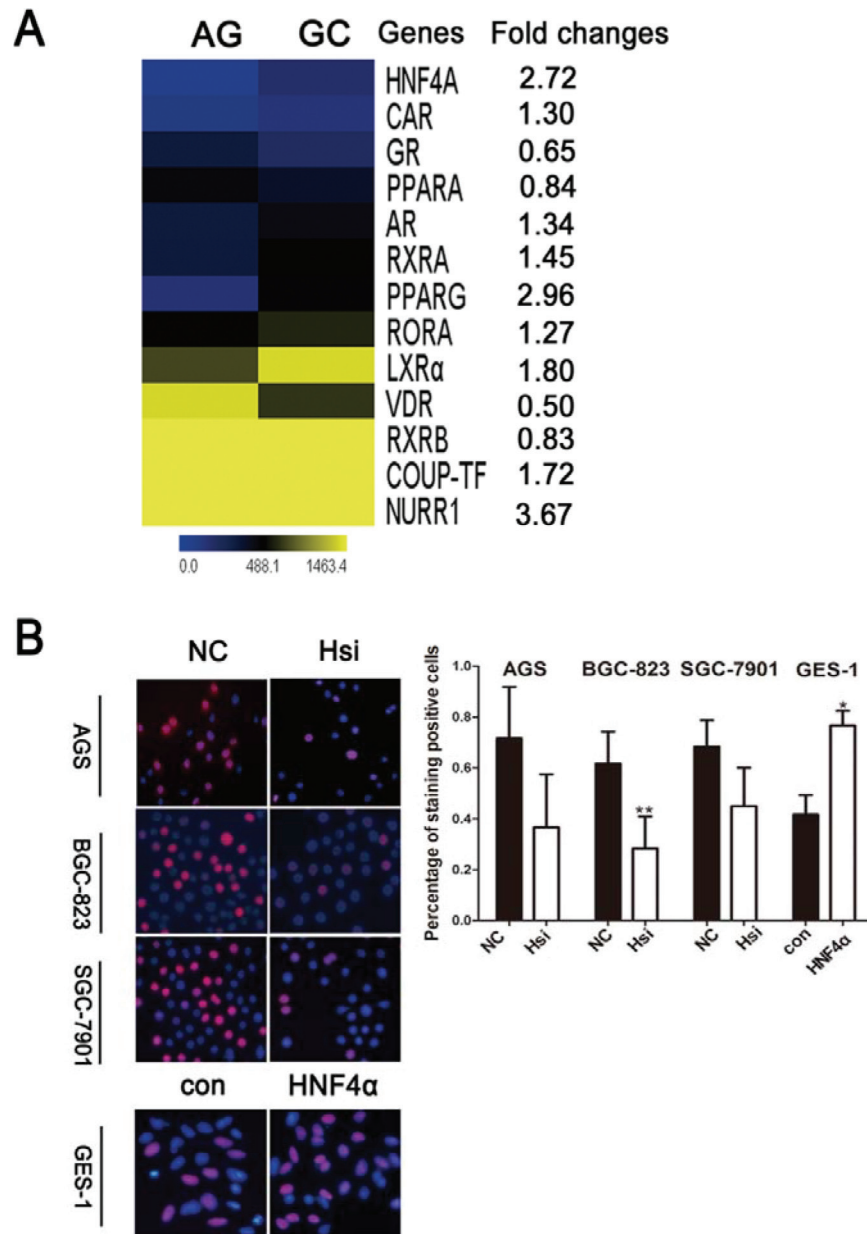

**Supplementary Figure S1:** A. Heat map shows expression changes of nuclear receptors in atrophic gastritis and gastric cancer. B. EdU staining after cells transfected HNF4 $\alpha$  siRNA or HNF4 $\alpha$  over-expression plasmid. Representative images are shown here from three independent biological replicates. \*P < 0.05, \*\*P < 0.01 by Student's t test.

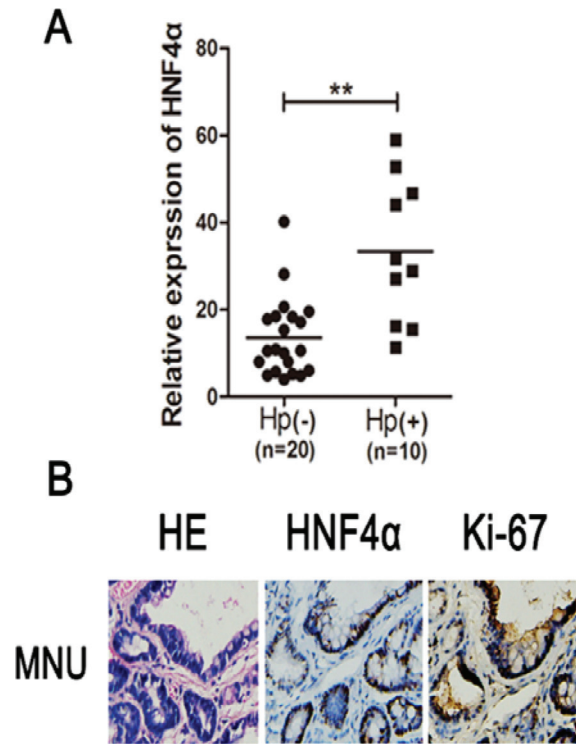

**Supplementary Figure S2:** A. The mRNA levels of HNF4α in 30 atrophic gastritis were measured by real-time PCR. The horizontal bars indicate the mean value of each sample group. \*\*p<0.01 by Mann-Whitney U-test. B. HE staining and IHC of HNF4α and Ki-67 in MNU group.

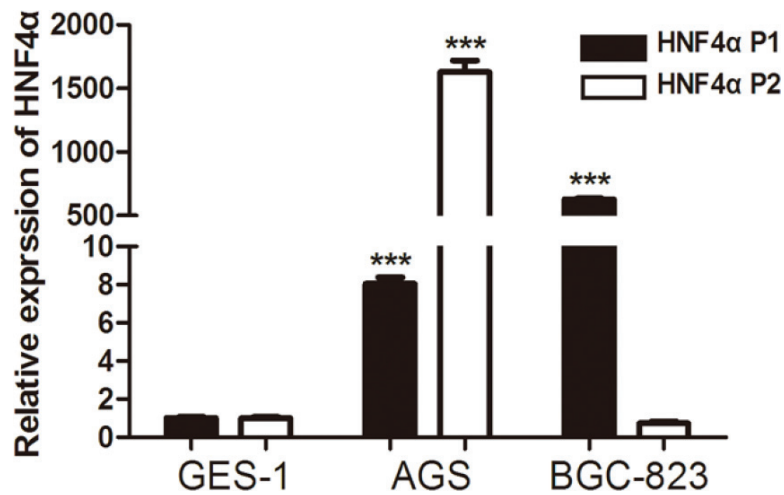

**Supplementary Figure S3:** Expression of P1- and P2-driven HNF4α in indicated cell lines using real-time PCR. \*\*\*P< 0.001 by Student's t test.

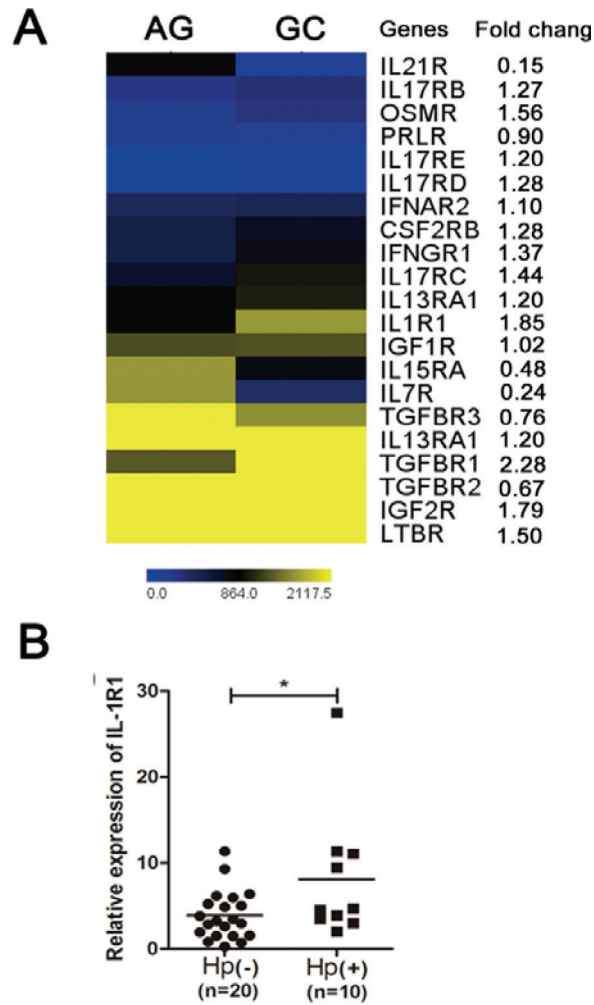

**Supplementary Figure S4: A.** Heat map shows expression changes of cellular surface receptors in atrophic gastritis and gastric cancer. **B.** The mRNA levels of IL-1R1 in 30 atrophic gastritis were measured by real-time PCR. The horizontal bars indicate the mean value of each sample group. \* $p < 0.05$  by Mann-Whitney U-test.

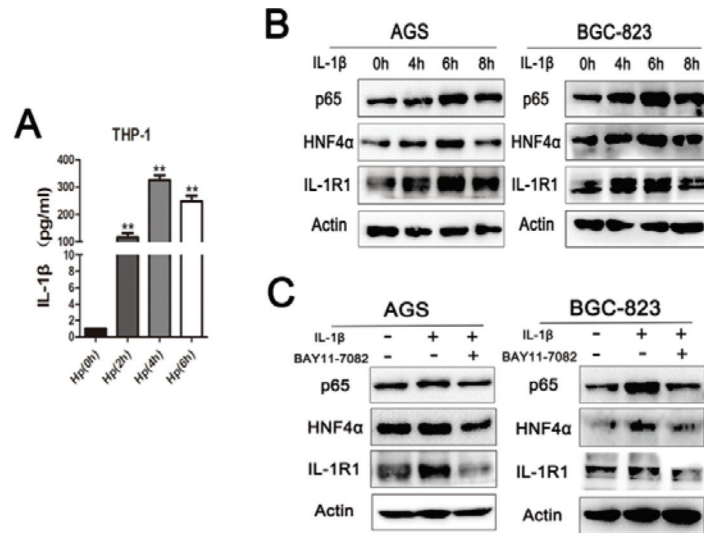

**Supplementary Figure S5:** A. Hp elicited IL-1β release by monocytic cell line THP-1. \*\*P < 0.01 by Student's t test. B. Western blot shows increased protein levels of p65, HNF4α and IL-1R1 when AGS and BGC-823 cells were treated with IL-1β (10ng/ml) for 4, 6 and 8 hours. C. BAY 11-7082 (1.0 mM) attenuated the induction of indicated protein expression by IL-1β.
